# Supplementary material
Source: PubMed Central journal article supplement (PMC4036806)
Supplement: NIHMS452400-supplement-1.pdf [file NIHMS452400-supplement-1.pdf]

**eTable 1: Quality Assessment of 5-HTTLPR, Stress and Depression Studies**

| Study                  | Introduction<br>1. Objectives and hypothesis clearly stated | Methods                                        |                                      |                                   |                      |                            |                                              | Results                                       |                                |                   | Discussion<br>11. Consideration of population |
|------------------------|-------------------------------------------------------------|------------------------------------------------|--------------------------------------|-----------------------------------|----------------------|----------------------------|----------------------------------------------|-----------------------------------------------|--------------------------------|-------------------|-----------------------------------------------|
|                        |                                                             | 2. Clear eligibility criteria for participants | 3. Clear definition of all variables | 4. Statistical Methods replicable | 5. Assessment of HWE | 6. Assessment of ethnicity | 7. Mixed ethnicities addressed statistically | 8. Sufficient descriptive data (age, gender,) | 9. Genotype frequencies stated | 10. Sample in HWE |                                               |
| Mossner et al, 2001    | +                                                           | -                                              | +                                    | +                                 | -                    | +                          | unnecessary                                  | -                                             | +                              | NA                | -                                             |
| Caspi et al, 2003      | +                                                           | +                                              | +                                    | +                                 | +                    | +                          | unnecessary                                  | +                                             | +                              | +                 | +                                             |
| Eley et al, 2004       | +                                                           | +                                              | +                                    | +                                 | +                    | -                          | -                                            | -                                             | +                              | +                 | -                                             |
| Grabe et al, 2004      | -                                                           | +                                              | +                                    | +                                 | +                    | -                          | -                                            | -                                             | +                              | +                 | +                                             |
| Kendler et al, 2005    | +                                                           | +                                              | +                                    | +                                 | -                    | +                          | unnecessary                                  | +                                             | +                              | NA                | +                                             |
| Nakatani et al, 2005   | +                                                           | +                                              | -                                    | +                                 | +                    | +                          | unnecessary                                  | +                                             | +                              | +                 | +                                             |
| Jacobs et al, 2006     | +                                                           | +                                              | +                                    | +                                 | +                    | +                          | unnecessary                                  | +                                             | +                              | +                 | +                                             |
| Kaufman et al, 2006    | +                                                           | +                                              | +                                    | +                                 | -                    | +                          | +                                            | +                                             | +                              | NA                | +                                             |
| Ramasubbu et al, 2006  | +                                                           | +                                              | -                                    | +                                 | -                    | +                          | unnecessary                                  | +                                             | +                              | NA                | +                                             |
| Sjoberg et al, 2006    | +                                                           | +                                              | +                                    | +                                 | +                    | -                          | -                                            | -                                             | +                              | +                 | -                                             |
| Surtees et al, 2006    | +                                                           | +                                              | +                                    | +                                 | +                    | -                          | -                                            | -                                             | +                              | +                 | +                                             |
| Taylor et al, 2006     | +                                                           | +                                              | +                                    | -                                 | +                    | +                          | +                                            | -                                             | +                              | +                 | +                                             |
| Wilhelm et al, 2006    | +                                                           | +                                              | +                                    | +                                 | +                    | +                          | unnecessary                                  | +                                             | +                              | +                 | -                                             |
| Zalsman et al, 2006    | +                                                           | +                                              | +                                    | +                                 | +                    | +                          | unnecessary                                  | +                                             | +                              | +                 | -                                             |
| Cervilla et al, 2007   | +                                                           | +                                              | +                                    | +                                 | +                    | -                          | -                                            | -                                             | +                              | +                 | -                                             |
| Chipman et al, 2007    | +                                                           | -                                              | +                                    | +                                 | +                    | +                          | unnecessary                                  | +                                             | +                              | -                 | -                                             |
| Chorbov et al, 2007    | +                                                           | +                                              | -                                    | -                                 | +                    | +                          | unnecessary                                  | +                                             | +                              | +                 | -                                             |
| Cicchetti et al, 2007  | +                                                           | +                                              | +                                    | +                                 | -                    | +                          | Partially                                    | +                                             | +                              | NA                | -                                             |
| Dick et al, 2007       | +                                                           | -                                              | -                                    | -                                 | -                    | +                          | unnecessary                                  | -                                             | -                              | NA                | -                                             |
| Kilpatrick et al, 2007 | +                                                           | +                                              | +                                    | +                                 | -                    | +                          | +                                            | +                                             | +                              | NA                | +                                             |
| Kim et al, 2007        | +                                                           | -                                              | +                                    | +                                 | +                    | +                          | unnecessary                                  | -                                             | +                              | +                 | +                                             |

|                            |   |   |   |   |   |   |             |   |   |    |   |
|----------------------------|---|---|---|---|---|---|-------------|---|---|----|---|
| Kraus et al, 2007          | + | + | + | + | + | - | -           | - | + | +  | + |
| Mandelli et al, 2007       | + | + | - | - | + | + | unnecessary | + | + | +  | + |
| Middeldorp et al, 2007     | - | + | + | + | + | - | -           | - | + | +  | + |
| Otte et al, 2007           | + | + | + | + | + | + | unnecessary | + | + | +  | + |
| Scheid et al, 2007         | + | + | + | + | + | + | unnecessary | + | + | -  | + |
| Brummett et al, 2008       | + | + | + | + | + | + | +           | + | + | +  | + |
| Kohen et al, 2008          | + | + | + | + | + | + | -           | + | + | +  | - |
| Lazary et al, 2008         | + | - | + | + | + | + | unnecessary | + | + | +  | - |
| Lenze et al, 2008          | + | + | - | - | + | + | -           | + | - | +  | + |
| Power et al, 2008          | + | - | + | + | + | - | -           | - | + | +  | - |
| Wichers et al, 2008        | + | - | - | - | + | + | unnecessary | - | + | +  | - |
| Aguilera et al, 2009       | + | + | + | + | + | + | unnecessary | + | + | +  | - |
| Araya et al, 2009          | - | - | + | + | + | + | -           | - | + | +  | + |
| Aslund et al, 2009         | + | + | + | + | + | + | +           | + | + | +  | + |
| Bull et al, 2009           | + | + | + | + | + | + | unnecessary | + | + | +  | + |
| Coventry at al, 2009       | + | - | + | + | - | + | -           | - | + | NA | - |
| Drachmann Bukh et al, 2009 | + | + | + | + | + | + | unnecessary | + | + | +  | + |
| Kim et al, 2009            | + | + | + | + | + | - | -           | - | + | +  | + |
| Laucht et al, 2009         | + | + | - | - | + | + | unnecessary | + | + | +  | + |
| Lotrich et al, 2009        | + | - | - | - | + | + | +           | + | + | +  | + |
| McCaffery et al, 2009      | + | + | - | - | + | + | unnecessary | + | - | +  | + |
| Ressler et al, 2009        | + | + | + | + | - | + | unnecessary | + | + | NA | + |
| Ritchie et al, 2009        | + | + | - | - | + | - | -           | - | + | +  | - |
| Wichers et al, 2009        | + | - | + | + | + | + | unnecessary | + | + | +  | - |
| Zhang et al, 2009          | + | - | + | + | + | + | unnecessary | + | - | +  | + |

|                         |   |   |   |   |   |   |             |   |   |   |   |
|-------------------------|---|---|---|---|---|---|-------------|---|---|---|---|
| Zhang et al, 2009       | + | - | + | + | + | + | unnecessary | - | + | + | + |
| Hammen et al, 2010      | + | + | + | + | + | + | -           | - | + | + | + |
| Benjet et al, in press  | + | + | + | + | + | + | -           | - | + | + | + |
| Grassi et al, in press  | + | - | + | - | + | - | -           | - | + | + | + |
| Kumsta et al, in press  | + | + | + | + | + | - | -           | - | + | + | - |
| Sen et al, in press     | + | + | + | + | + | + | +           | + | + | + | + |
| Sugden et al, in press  | + | + | + | + | + | - | -           | - | + | + | - |
| Goldman et al, in press | + | + | + | + | + | + | unnecessary |   | + | + | + |
